# Supplementary material
Source: publisher site journal article supplement (https://www.dovepress.com/article/298697)
Supplement: Supplementary file 1 [file get_supplementary_file.php]

**Supplementary file**

**Table S1**: Total PSA (TPSA) and Free PSA (FrPSA) were monitored to reflect the activity of prostate cancer in the patient.

| Testing Date | TPSA | FrPSA |
| --- | --- | --- |
| Aug-04,2014 | 0.01 | <0.01 |
| Oct-14,2014 | 0.073 | 0.017 |
| Dec-03,2014 | 0.061 | 0.018 |
| Feb-04,2015 | 0.123 | 0.024 |
| Mar-03,2015 | 0.051 | 0.025 |
| Apr-08,2015 | 0.160 | 0.039 |
| May-27,2015 | 0.103 | 0.026 |
| Jul-10,2015 | 1.100 | 0.130 |
| Nov-30,2015 | 0.478 | 0.141 |

Note: PSA, prostate specific antigen; TPSA, total prostate specific antigen; FrPSA, free prostate specific antigen
